# Supplementary material
Source: HighWire-hosted journal article supplement (https://bjo.bmj.com/content/104/3/312)
Supplement: inline-supplementary-material-1 [file inline-supplementary-material-1.pdf]

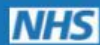

Moorfields Eye Hospital  
NHS Foundation Trust

# Optometrist Referral Platform

Demo Clinic | [LOGOUT](#)

John Smith

DOB 1901-01-01  
ID 1234

## Are you experiencing **vision loss**?

No vision loss

Distant objects

Near objects

Central 

Peripheral (tunnel vision)

Central

## What is the severity of the **vision loss**?

Mild

Moderate

Severe

Very Severe (blind)

## What is the progression of **vision loss**?

Slow (weeks/months)

Quick (hours/days)

## Are you experiencing **eye pain**?

None`

Mild

Moderate

Severe

Very Severe

### Patient Feedback:

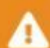

This patient will be prioritised and can expect their scans to be reported within 48 hours.

Back

© Big Picture Medical Pty Ltd. Patent Pending.

Next
